# Supplementary material for: Three Pt(ii) complexes based on thiosemicarbazone: synthesis, HSA interaction, cytotoxicity, apoptosis and cell cycle arrest
Source: Royal Society of Chemistry journal article supplement (doi:10.1039/c7ra04443g), 2017-01-01
Supplement: c7ra04443g1.pdf [file c7ra04443g1.pdf]

**Supplementary Material for**

**Three Pt(II) complexes based on Thiosemicarbazone: synthesis,  
HSA interaction, cytotoxicity, apoptosis and cell cycle arrest**

Xu-Dong Lin,<sup>1a</sup> Ya-Hong Liu,<sup>1a</sup> Cheng-Zhi Xie,<sup>a</sup> Wei-Guo Bao,<sup>a</sup> Jun Shen<sup>b,\*</sup> and  
Jing-Yuan Xu<sup>a,\*</sup>

*<sup>a</sup>Department of Chemical Biology and Tianjin Key Laboratory on Technologies Enabling  
Development of Clinical Therapeutics and Diagnostics (Theranostics), School of Pharmacy, Tianjin  
Medical University, Tianjin 300070, P. R. China.*

*<sup>b</sup>Department of Sanitary Chemistry, School of Public Health, Tianjin Medical University, Tianjin  
300070, P. R. China.*

**\*Corresponding author:**

Tel: +86 022 83336658, E-mail: xujingyuan@tmu.edu.cn (Prof. J. Y. Xu);

Tel: +86 022 83336638, E-mail: shenjun@tmu.edu.cn (Prof. J. Shen).

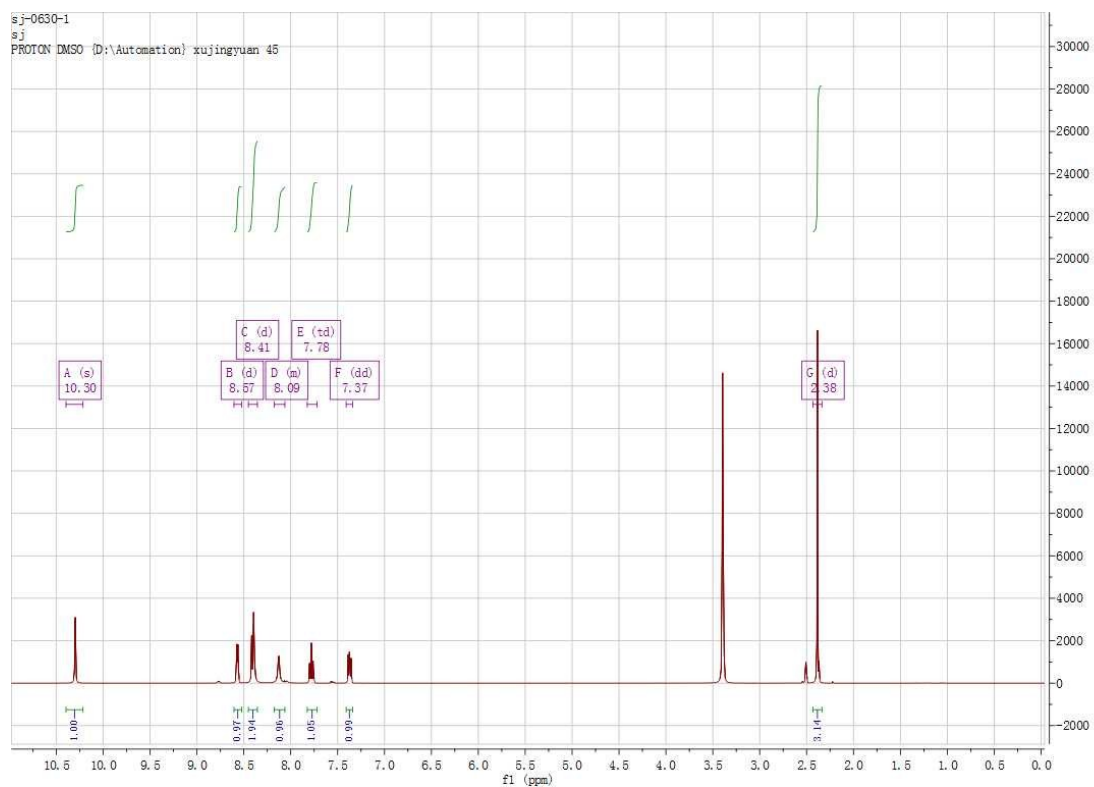

**Fig. S1-1.**  $^1\text{H}$  NMR spectrum of Ligand 1.

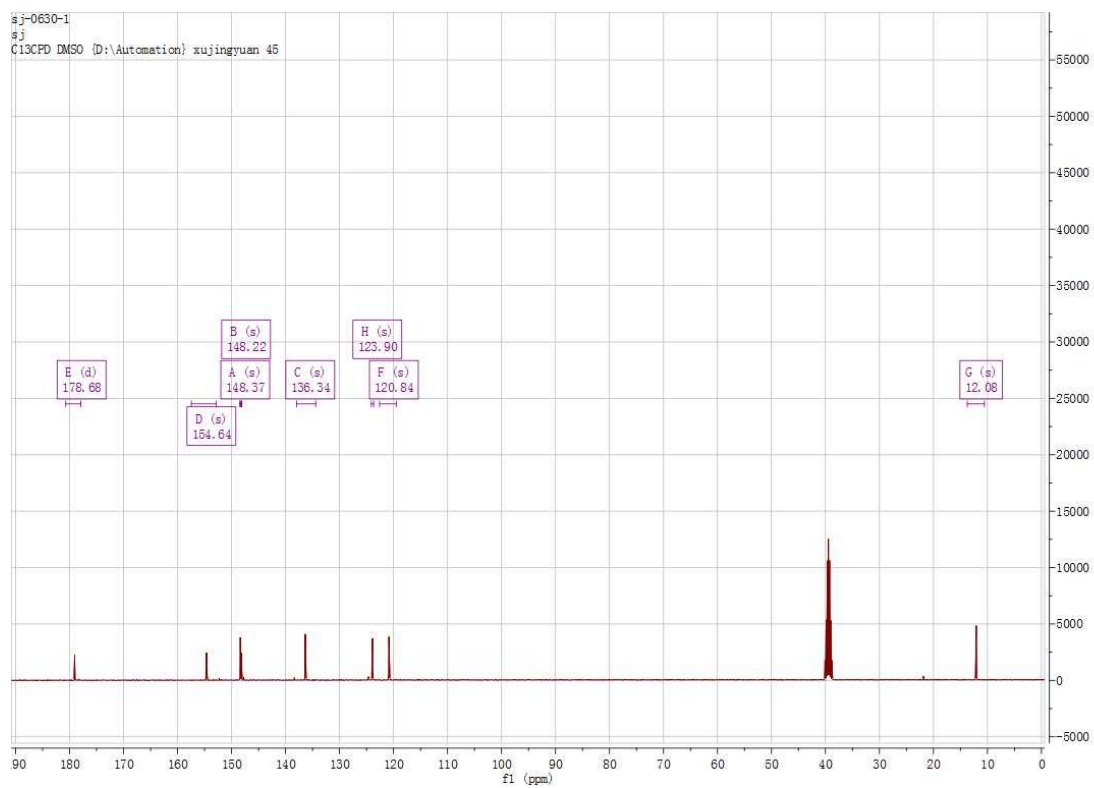

**Fig. S1-2.**  $^{13}\text{C}$  NMR spectrum of Ligand 1.

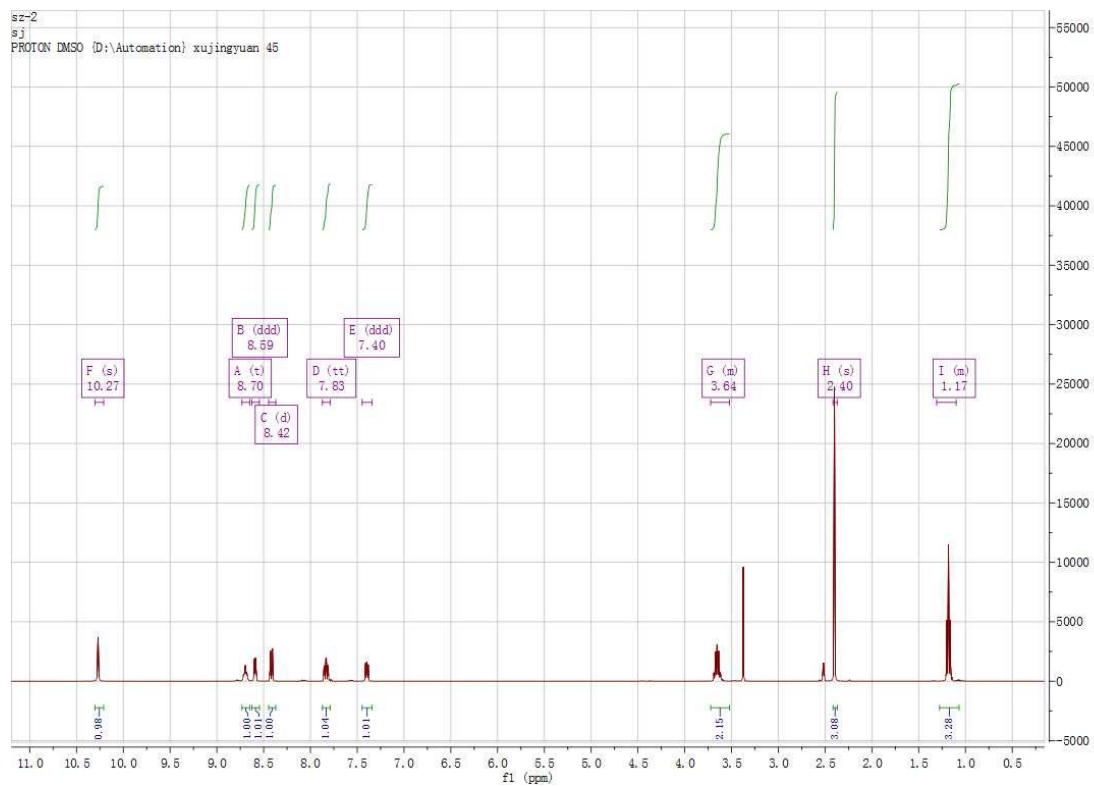

**Fig. S1-3.**  $^1\text{H}$  NMR spectrum of Ligand 2.

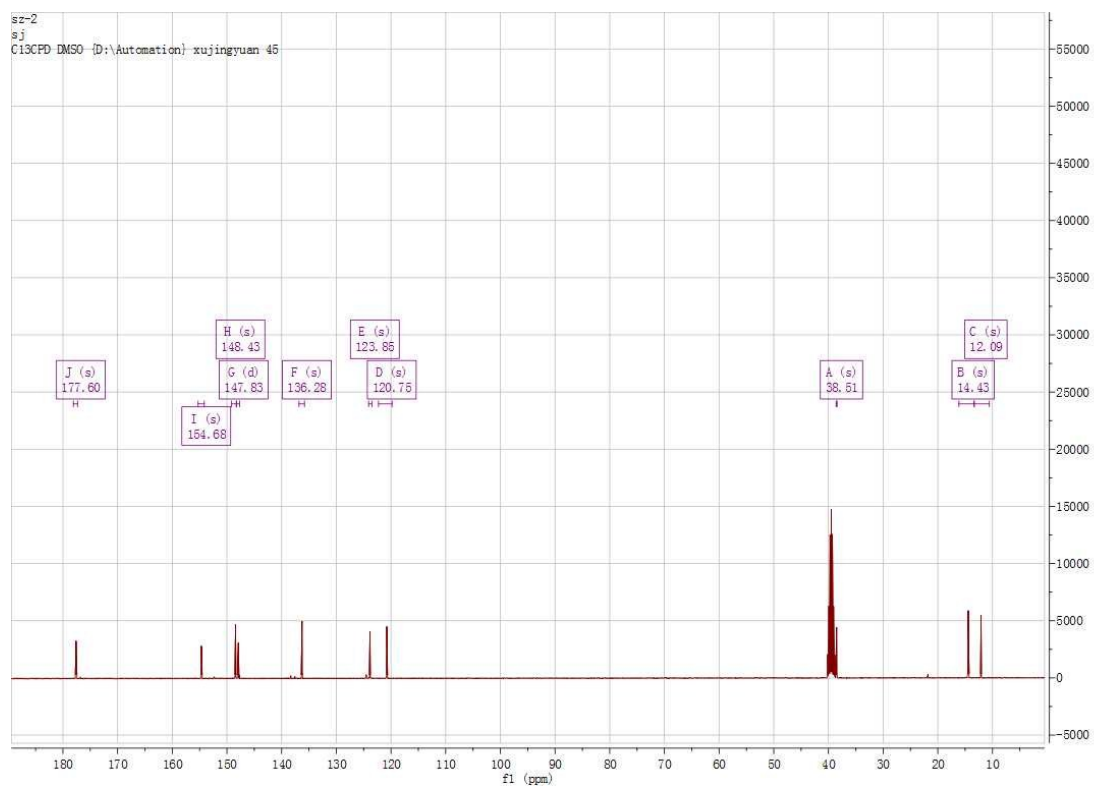

**Fig. S1-4.**  $^{13}\text{C}$  NMR spectrum of Ligand 2.

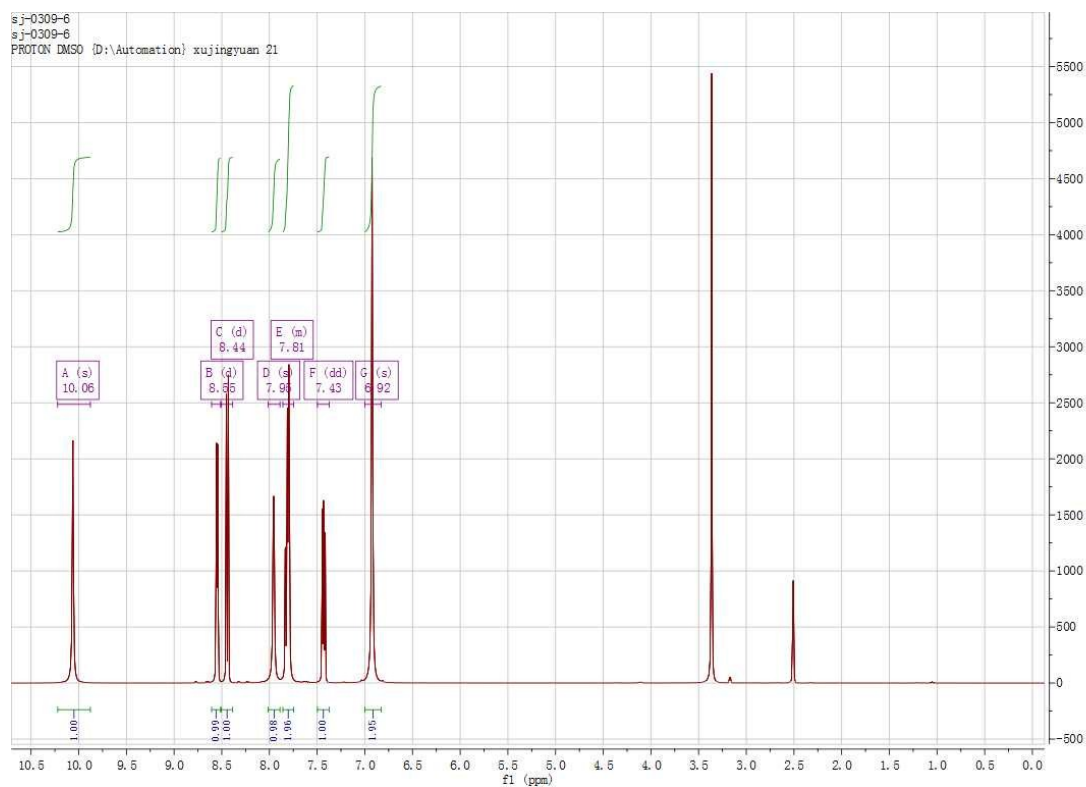

**Fig. S1-5.**  $^1\text{H}$  NMR spectrum of Ligand 3.

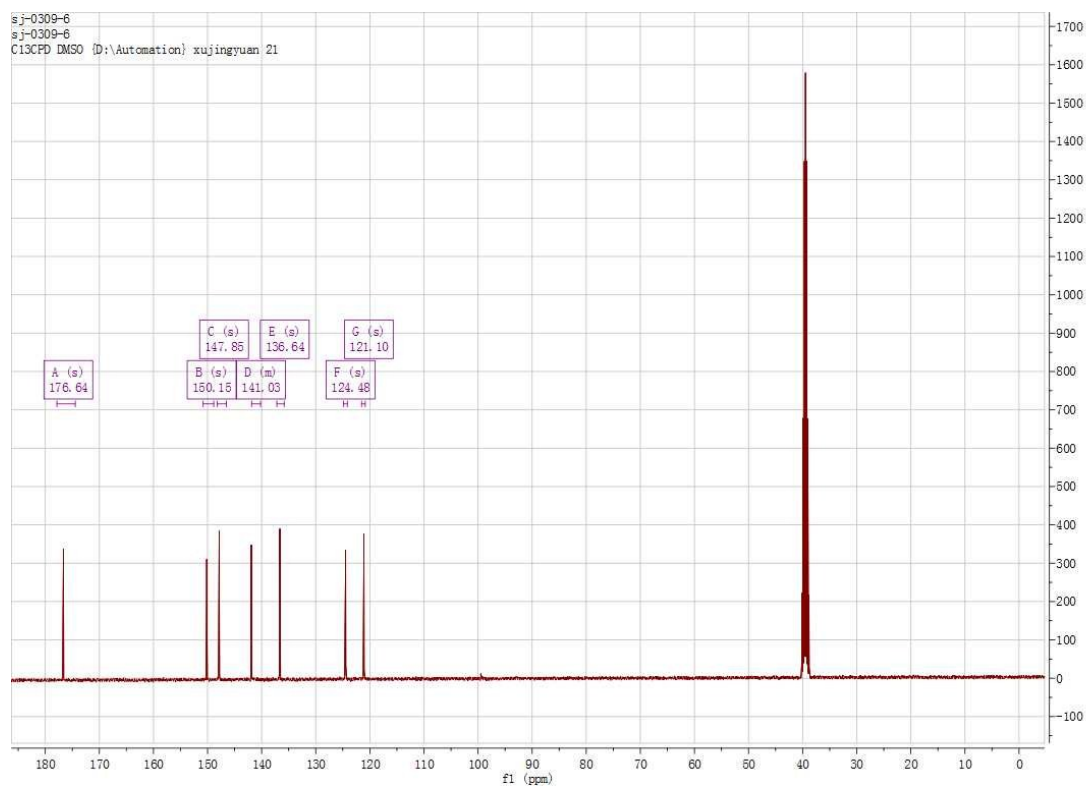

**Fig. S1-6.**  $^{13}\text{C}$  NMR spectrum of Ligand 3.

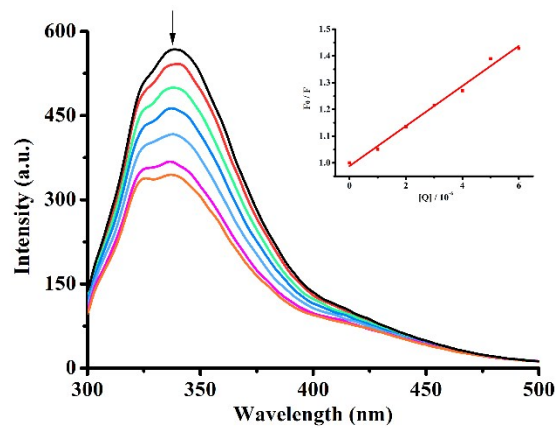

**Fig. S2-1.** Fluorescence spectra of HSA in the different concentrations of **1** at room temperature.

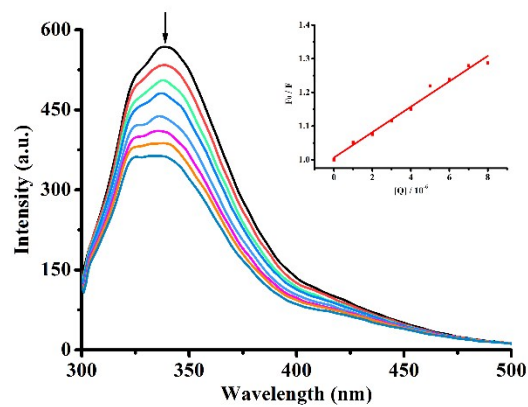

**Fig. S2-2.** Fluorescence spectra of HSA in the different concentrations of **2** at room temperature.

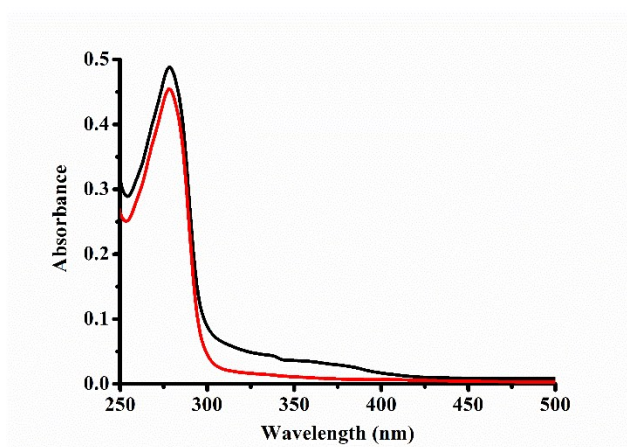

**Fig. S2-3.** UV-vis absorption spectra of HSA in the absence and presence of **1**.

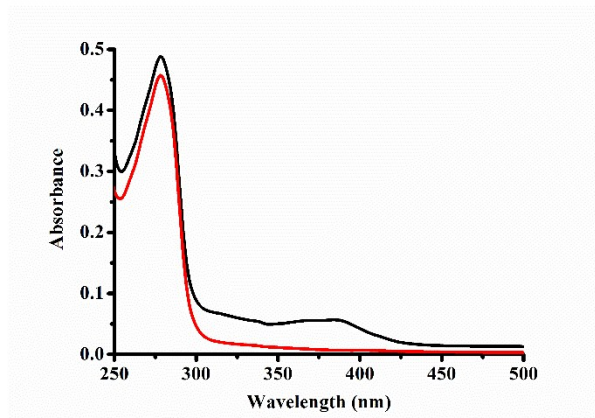

**Fig. S2-4.** UV-vis absorption spectra of HSA in the absence and presence of **2**.

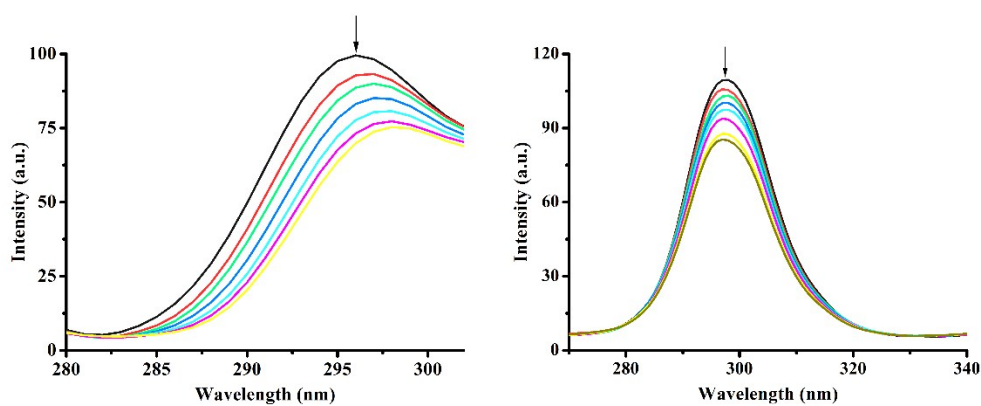

**Fig. S2-5.** Synchronous fluorescence spectra of HSA upon addition of **1**.

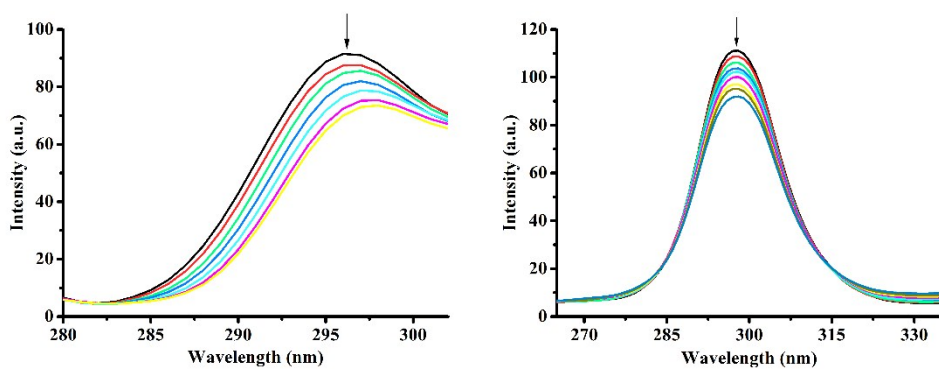

**Fig. S2-6.** Synchronous fluorescence spectra of HSA upon addition of **2**.

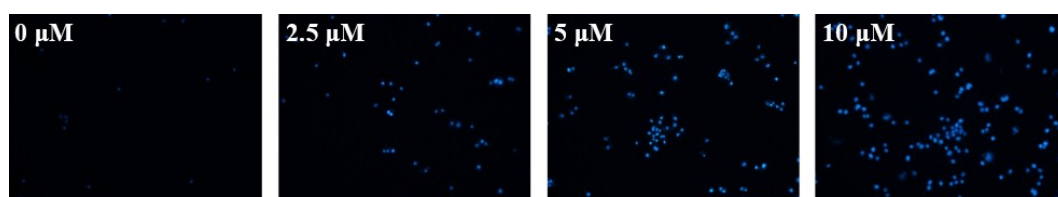

**Fig. S3-1.** Hoechst 33342 staining detected apoptosis in HeLa cells after treatment by **1** for 48 h at the concentrations of 0, 2.5, 5, and 10  $\mu\text{M}$ .

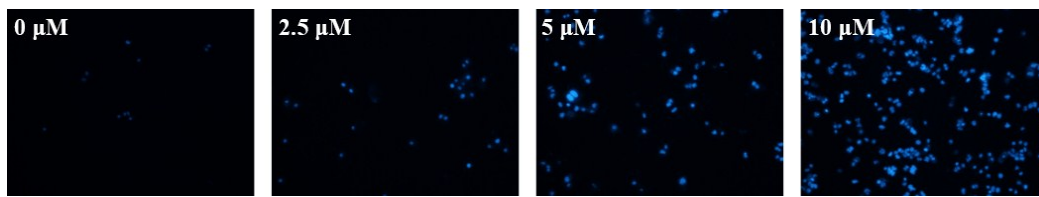

**Fig. S3-2.** Hoechst 33342 staining detected apoptosis in HeLa cells after treatment by **2** for 48 h at the concentrations of 0, 2.5, 5, and 10  $\mu\text{M}$ .

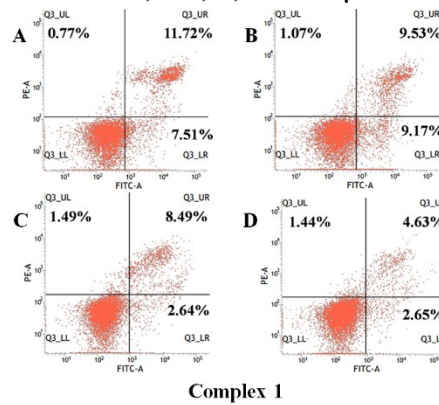

**Fig. S4-1.** The quantitative analysis of the proportion of viable, necrosis and apoptosis cells against HeLa cells after the treatment with **1** for 48 h at concentration of 0, 2.5, 5, and 10  $\mu\text{M}$ .

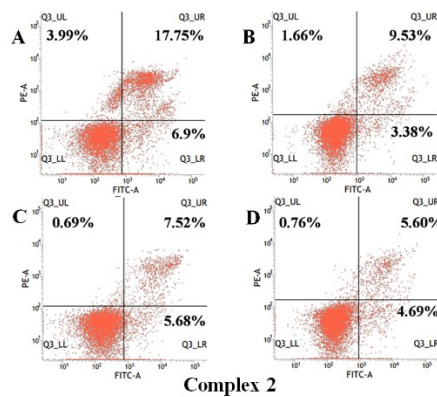

**Fig. S4-2.** The quantitative analysis of the proportion of viable, necrosis and apoptosis cells against HeLa cells after the treatment with **2** for 48 h at concentration of 0, 2.5, 5, and 10  $\mu\text{M}$ .

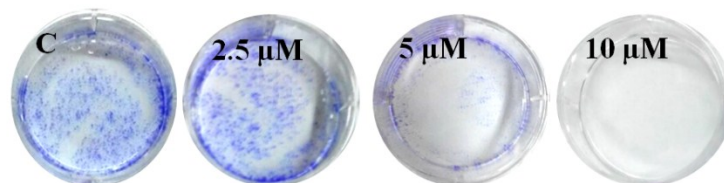

**Fig. S5.** Clonogenic assay (crystal violet staining) in HeLa cells exposed to varying concentrations of **3**.
